# Supplementary material
Source: PubMed Central journal article supplement (PMC2771108)
Supplement: NIHMS152751-supplement-01.pdf [file NIHMS152751-supplement-01.pdf]

## Supplemental Data

# A Small Molecule Inhibitor of Inducible Heat Shock Protein 70

J. I-Ju Leu, Julia Pimkina, Amanda Frank, Maureen E. Murphy, and Donna L. George

A

2-Phenylethynylsulfonamide (PES)

(C<sub>8</sub>H<sub>7</sub>NO<sub>2</sub>S)

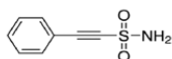

B

Human HSP70

MAKAAAIGID LGTTYSCVGV FQHGK**VEIIA** **NDQGNRTTPS** **YVAFTDTERL**  
 IGDAAK**NOVA** **LNPQNTVFDA** **KRLIGRKF**GD PVVQSDMKHW PFQVINDGDK  
 PKV**QVSYKGE** **TKAFYP**EEIS **SMVLTKMKEI** AEAYLGYPVT NAVITVPAYF  
 NDSQR**QATKD** **AGVIAGL**NVL **RIINEPTAAA** **IAYGLDR**TGK GERNVLI<sup>FDL</sup>  
 GGGTFDVSIL TIDDGIFEVK **ATAGDTHLGG** **EDFDNRL**VNH FVEEFKRKHK  
 KDISQNKRAV RRLRTACERA KRTLSSSTQA SLEIDSLFEG IDFYTSITRA  
 RFEELCSDLF **RSTLEPVEKA** LRDAKLDK**AO** **IHDLVLVGGS** **TRIPKVQKLL**  
**QDFFN**GRDLN KSNPDEAVA YGAAVQAAIL MGDKSENVQD LLLLDVAPLS  
 LGLETAGGVM TALIKRNSTI PTKQTQIFTT YSDNQPGVLI QVYEGERAMT  
**KDNLLGR**FE LSGIPPAPRG VPQIEVTFDI DANGILNVTA TDKSTG**KANK**  
**ITITNDKGR**L **SKEEIER**MVQ EAEKY**KA**EDE **VQRERVS**AKN **ALESYAF**NMK  
**SAVEDEGLK**G **KISEADK**KKV LDKCQEVISW LDANTLAEKD EFEHKRKELE  
 QVCNPIISGL YQGAGGPGPG GFQAQ**GP**KG **SGSGPTIEE**V **D**

Human HSC70

MSKGPVAVGID LGTTYSCVGV FQHGK**VEIIA** **NDQGNRTTPS** **YVAFTDTERL**  
 IGDAAK**NOVA** **MNPTNTVFDA** **KRLIGRRF**DD AVVQSDMKHW PFMVVNDAGR  
**PKVQVEYKGE** **TKSFYP**EEVS **SMVLTKMKEI** **AEAYLGKT**VT **NAVVTVPAYF**  
**NDSQRQATKD** **AGTIAGL**NVL **RIINEPTAAA** **IAYGLDE**KVG AERNVLI<sup>FDL</sup>  
 GGGTFDVSIL TIEDGIFEVK **STAGDTHLGG** **EDFDNR**MVNH FIAEFKRKHK  
 KDISQNKRAV RRLRTACERA KRTLSSSTQA SIEIDSLYEG IDFYTSITRA  
 RFEELNADLF **RGTLDPVEKA** LRDAKLDK**SO** **IHDIVLVGGS** **TRIPKIQKLL**  
 QDFFNKELN KSNPDEAVA YGAAVQAAIL SGDKSENVQD LLLLDVTPLS  
 LGIETAGGVM TVLIKRNFTI PTKQTQFTTT YSDNQPGVLI QVYEGERAMT  
 KDNLLGKFE LTGIPPAPRG VPQIEVTFDI DANGILNVSA VDKSTGKENK  
**ITITNDKGR**L **SKEDI**ERMVQ EAEKY**KA**EDE KQRDKVSSKN **SLESYAF**NMK  
 ATVEDEKLQG KINDEDKQKI LDKCNEIINW LDKNQTAKEE EFEHQQKELE  
 KVCNPIITKL YQSAGGMPGG MPGGFPGGA PPSGASSGP TIEEVD

C

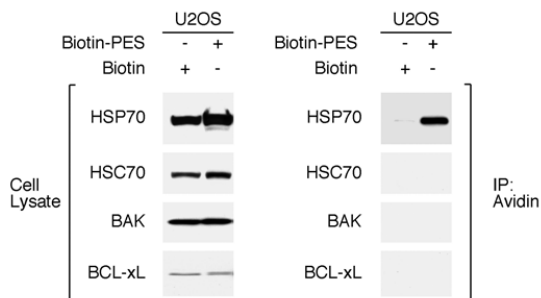

**Figure S1. The Interaction of B-PES and HSPs**

(A) Chemical structure of PES (from EMD Chemicals, Inc.).

(B) The amino acid sequence of inducible HSP70 (left) and HSC70 (right); the residues detected by mass spectrometry are shown in bold and underlined.

(C) WCE were prepared from U2OS cells following 24 h treatment with 20  $\mu$ M Biotin or B-PES, and immunoblotted for the proteins as indicated (left). B-PES-containing complexes were captured by NeutrAvidin Resins, and eluted following 100 mM DTT treatment. IP-WB analysis using the indicated antibodies reveals interaction of B-PES with endogenous HSP70, but not endogenous BAK, BCL-xL, or HSC70.

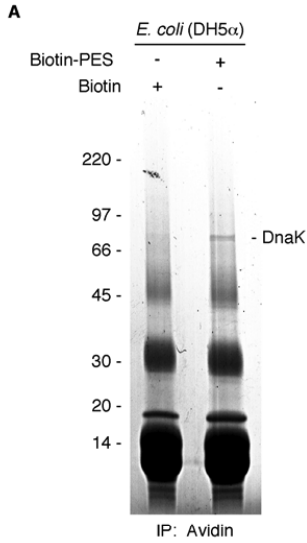

**B**

DnaK

MGKIIIGIDLG TTNSCVAIMD GTTPRVLENA EGDRTTPSII AYTQDGETLV  
 GQPAKRQAVT **NPQNTLFAIK** **RLIGRRFQDE** **EVQRDVSIMP** **FKIIAANDGD**  
**ANVEVKRQKM** **APPQISAEVL** **KKMKKTAEDY** LGEPVTEAVI TVPAYFNDAQ  
 RQATKDAGRI **AGLEVKRIIN** **EPTAAALAYG** **LDKGTGNRTI** AVYDLGGGTF  
 DISIIEIDEV DGEKTFEVL A TNGDTHLGG E DFDSRLINYL VEEFKKQGGI  
 DLR**NDPLAMQ** **RLKEAAEKAK** IELSSAQQTD VNLPLYTADA TGPKHMNIKV  
 TRAKLESLVE DLVNRSIEPL KVALQDAGLS VSDIDDVILV GGQTRMPMVQ  
 KK**VAEFFGKE** **PRKDVNPDEA** VAIGAAVQGG VLTGDVKDVL LLDVTPLSLG  
 IETMGVGMTT LIAKNNTIPT KHSQVFSTAE DNQSAVTIHV LQGERK**RAAD**  
**NKSLGGFNLD** **GINPAPRGMP** QIEVTFDIDA DGIHVSAKD KNSGKEQKIT  
 IK**ASSGLNED** **EIQKMRVDAE** ANAEAD**RKFE** **ELVQTRNOGD** **HLHSTRKQV**  
 EEAGDKLPAD DKTAIESALT ALETALKGED KAAIEAK**MQE** **LAQVSQKLME**  
 IAQQQHAQQQ TAGADASANN AKDDDVVDAE FEEVKDKK

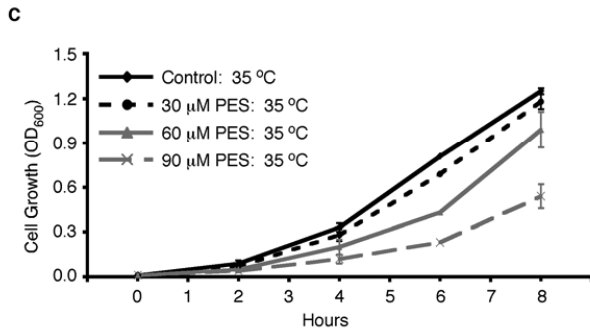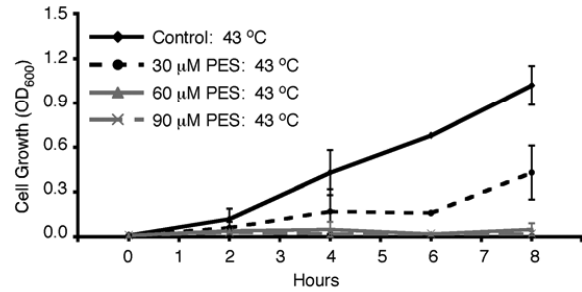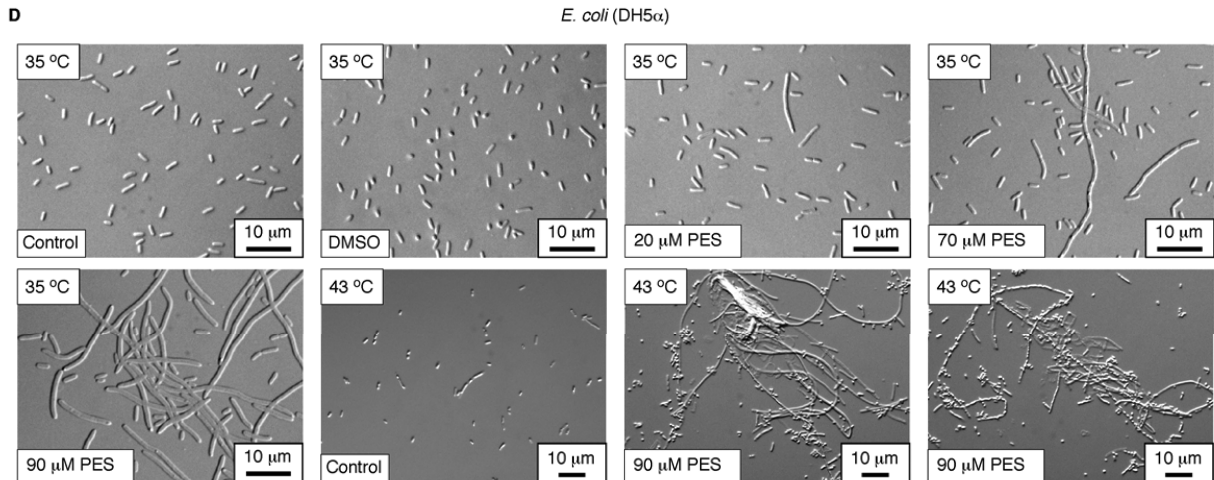

**Figure S2. PES and *E. coli***

(A) Identification of DnaK as Biotin-PES (B-PES) interacting protein in bacteria by liquid chromatography-tandem mass spectrometry, as described in Supplemental Experimental Procedures.

(B) The amino acid sequence of DnaK; the residues detected by mass spectrometry are shown in bold and underlined.

(C) Growth curves of *E. coli* treated with different concentrations of PES either at 35°C or 43°C. Since bacteria with some mutations in DnaK exhibit a thermosensitive phenotype, we treated liquid bacterial cultures with increasing concentrations of PES at temperatures of 35°C or 43°C. Cell proliferation was inhibited in a dose-dependent fashion, especially at 43°C.

(D) Bacterial morphology (phase contrast microscopy) following treatment of the cells with PES at the indicated temperatures. Note evidence of filamentation and aggregation at higher concentrations of PES, especially at 43°C.

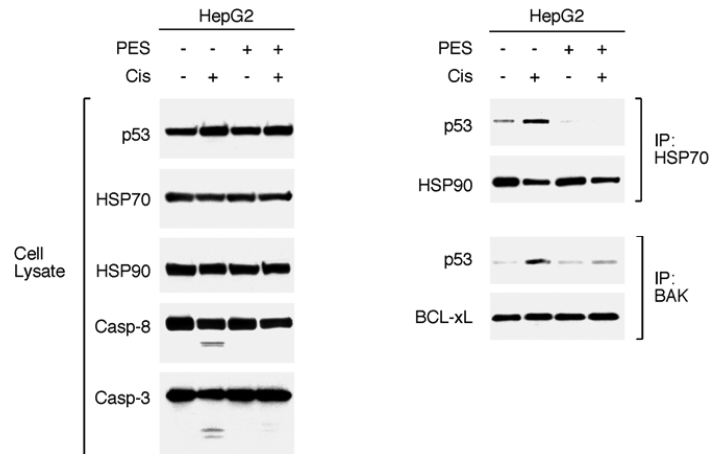

**Figure S3. PES Attenuates a p53/BAK Interaction and Inhibits Caspase Activation**

Whole cell extracts (WCE) prepared from HepG2 cells that were either untreated or pretreated with PES (20  $\mu$ M) for 1 h, followed by the addition of 50  $\mu$ M cisplatin for 14 h. Note evidence of caspase cleavage in cisplatin-treated cells, but not in the presence of PES. Extracts were immunoprecipitated with anti-HSP70 or anti-BAK antibody, and blotted with anti-p53, anti-BCL-xL, or anti-HSP90, as indicated. The data provide evidence that PES inhibits the interaction of p53 with both HSP70 and BAK.

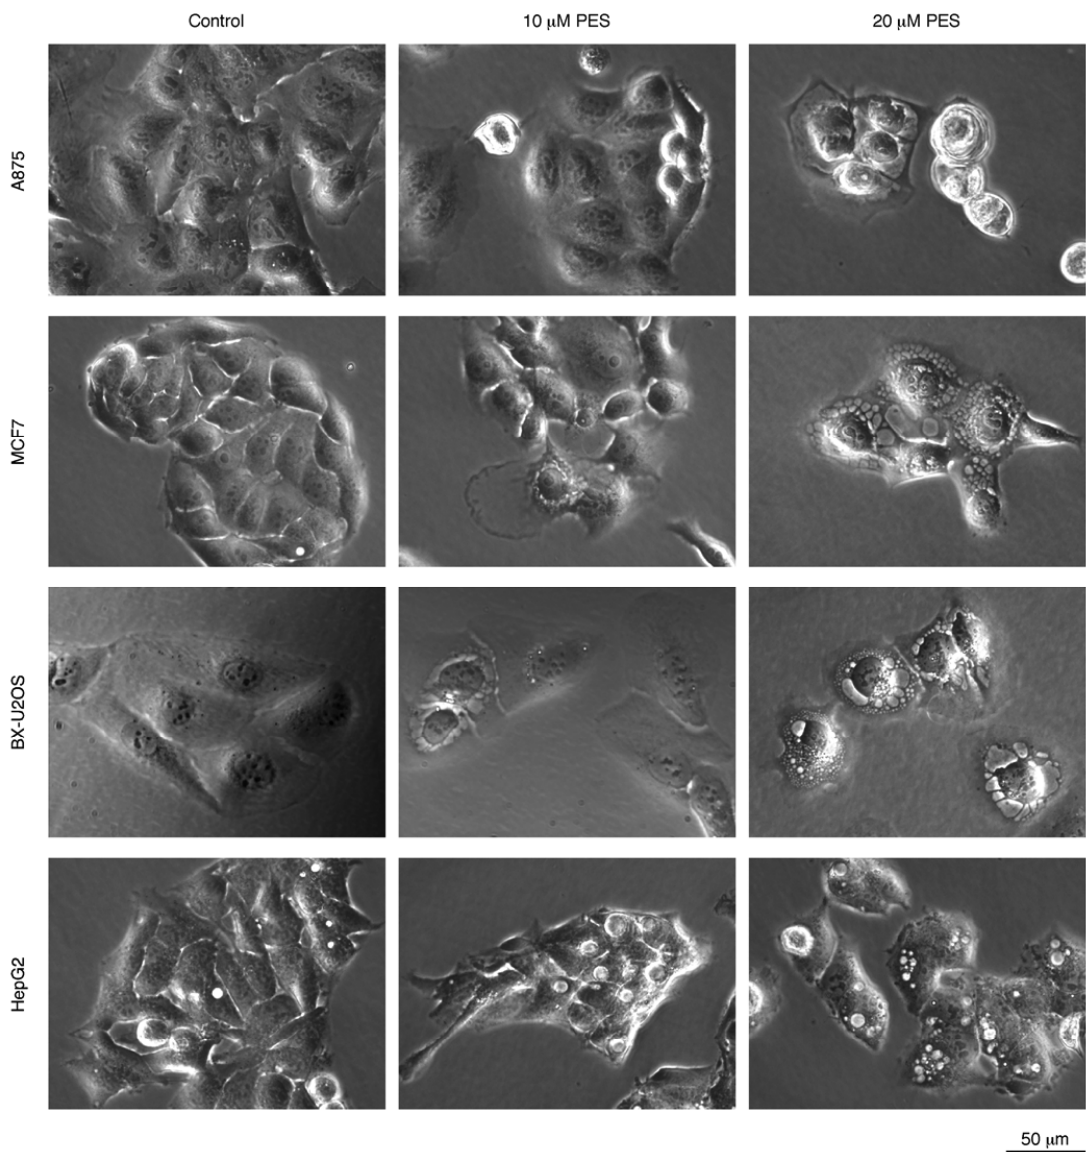

### Figure S4. PES Induces Cytoplasmic Vacuolization

Representative phase-contrast images of indicated human cell lines after 24 h of treatment using indicated amount of PES. Note the increased appearance of cytoplasmic vacuoles following increasing dosage of PES exposure.

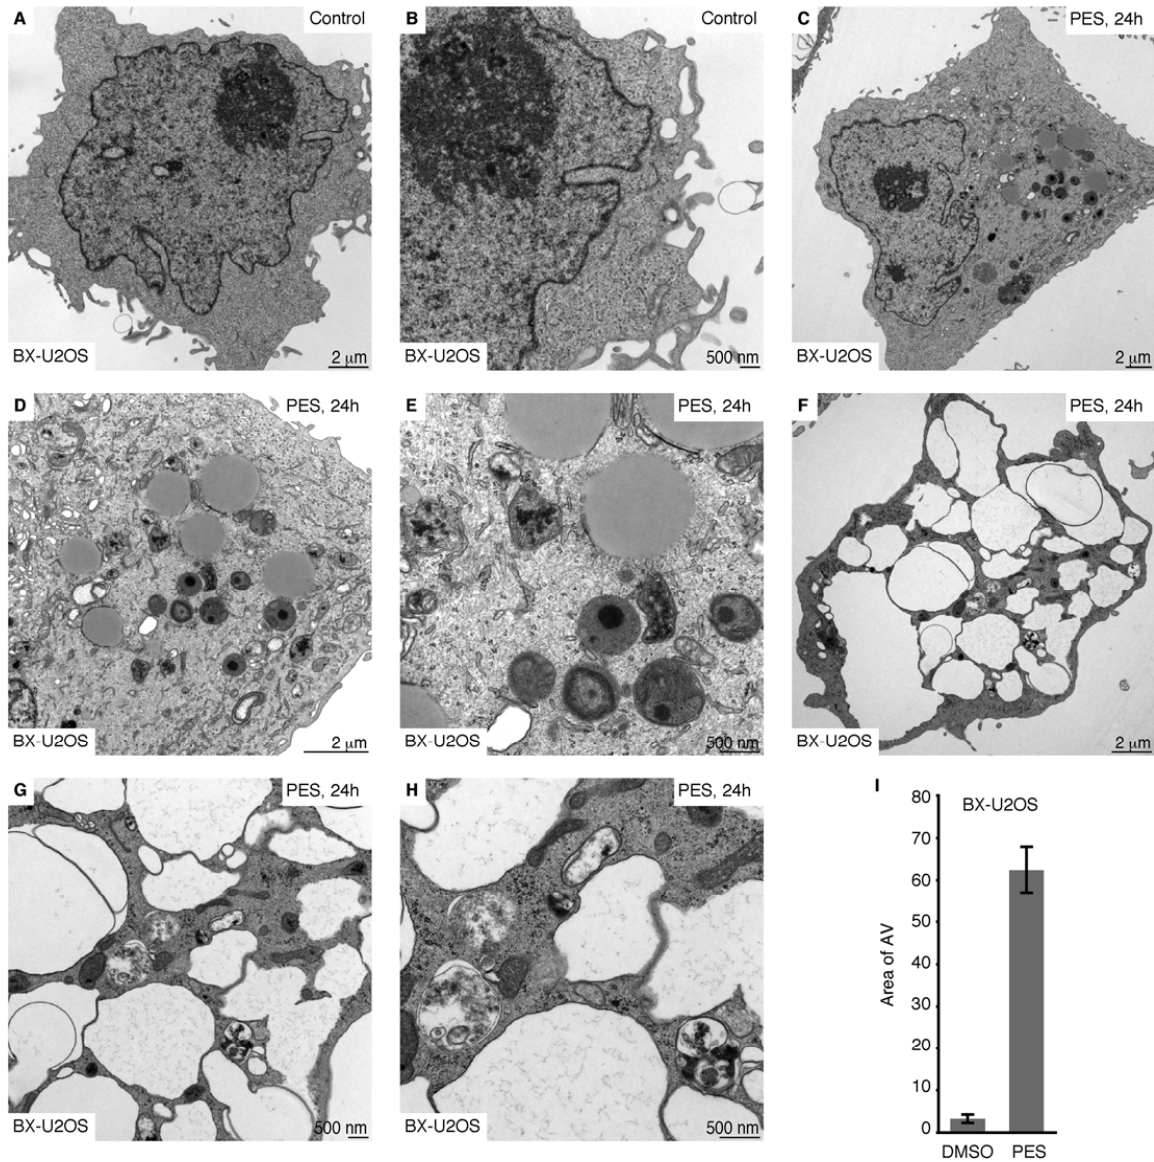

**Figure S5. PES Induces Markers of Autophagy**

(A-H) Electron micrographs of BX-U2OS cells treated with or without PES (20  $\mu$ M) for 24 h.

(D) Double membrane autophagic vacuoles (AV) are depicted.

(E) Electron dense AVs containing partially digested cytoplasmic contents are displayed.

(F-H) Numerous large AVs containing partially digested cytoplasmic elements as well as amorphous, membranous, aggregated, or granular masses are shown.

(I) The average area of autophagic vacuoles (AV) per cell calculated with Image J software is indicated. Error bars indicate SD.



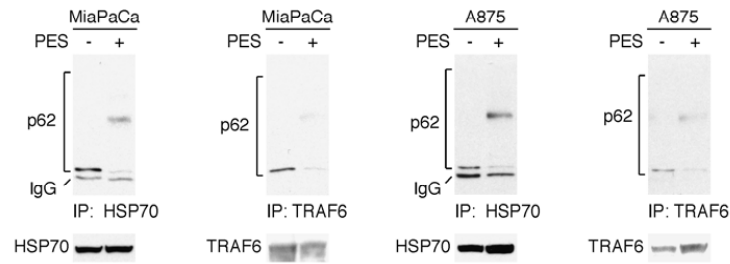

**Figure S6. PES Attenuates the Interactions between HSP70 and Monomeric p62/SQSTM1 as well as Between HSP70 and Monomeric TRAF6**

IP-WB analyses of WCE from vehicle or PES-treated MiaPaCa pancreatic cells (top panel) and A875 melanoma cells (lower panel). Note that HSP70 binds to the oligomeric forms of p62/SQSTM1 following PES-exposure. In contrast, stable interactions between HSP70 and monomeric p62/SQSTM1 as well as between TRAF6 and monomeric p62/SQSTM1 were noted in vehicle treated cells.

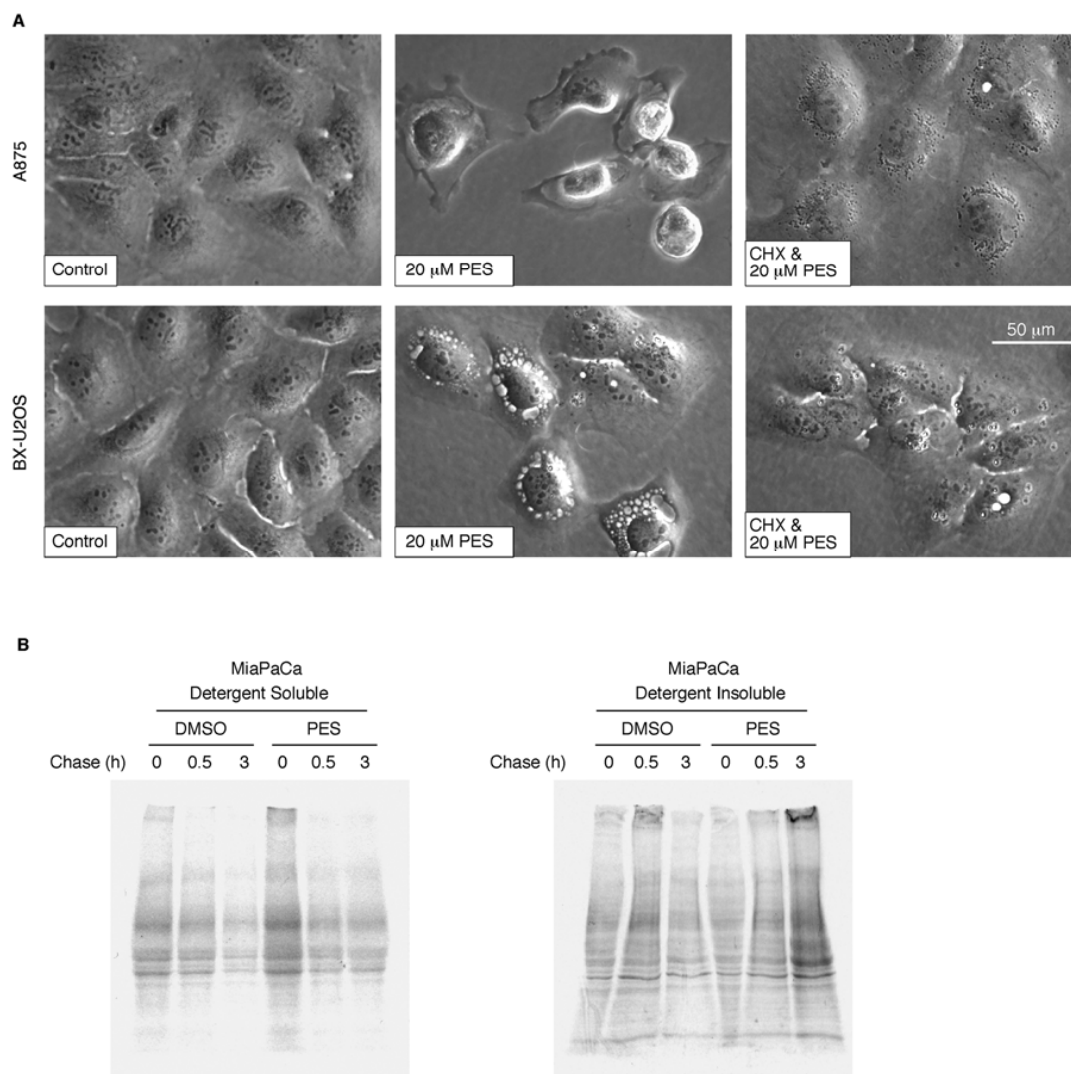

### Figure S7. Cycloheximide Reduces PES-Induced Cytoplasmic Vacuolization

(A) Representative phase-contrast images of indicated tumor cell lines pretreated with DMSO or 1  $\mu\text{g/ml}$  of cycloheximide (CHX) for 1 h, followed by the addition of 20  $\mu\text{M}$  PES for 23 h.

(B) The molecular chaperone HSP70 has been implicated in promoting proper folding of nascent polypeptides. Also, increased levels of p62/SQSTM1 have been found to result from either increased synthesis or blockage of autophagy. Since we found that PES inhibits long-lived

protein degradation (Figure 5A), we also evaluated how PES might affect the disposition of newly synthesized proteins. Briefly, MiaPaCa cells were incubated in methionine/cysteine starvation medium for 30 min before adding [<sup>35</sup>S]methionine/cysteine and DMSO or [<sup>35</sup>S]methionine/cysteine and 20 μM PES, as indicated, to pulse for 1 h. Following the pulse, cells were immediately chased by complete medium for 0, 0.5, or 3 h, either in the presence of DMSO or 20 μM PES, as indicated. Cells were harvested at indicated time points, lysed in 1% NP40-containing buffer, and fractionated into detergent-soluble and detergent-insoluble preparations. Note the increase in the newly-synthesized proteins in the detergent-insoluble fraction from PES-treated cells apparent 3h following the chase in complete medium.
